# Supplementary material for: Health-Related Quality of Life and Health-Adjusted Life Expectancy of People With Diabetes in Ontario, Canada, 1996–1997
Source: Oxford University Press journal article supplement (doi:10.2337/diacare.27.2.407), 2004-02-01
Supplement: 407-sup-manuelonlineappendix.pdf [file 407-sup-manuelonlineappendix.pdf]

## Appendix 1 - Health-related quality of life (HRQOL) measures

| HRQOL measure                                                        | Survey Question (s)                                                                                                                                                                                                                                                                   | What it Captures                                                                                                          |
|----------------------------------------------------------------------|---------------------------------------------------------------------------------------------------------------------------------------------------------------------------------------------------------------------------------------------------------------------------------------|---------------------------------------------------------------------------------------------------------------------------|
| <b>Measures of physical functioning</b>                              |                                                                                                                                                                                                                                                                                       |                                                                                                                           |
| Vision                                                               | Are you usually able to see well enough to read newsprint without or with glasses or contact lenses?                                                                                                                                                                                  | Vision problems that cannot be corrected by lenses.                                                                       |
| Mobility                                                             | Are you usually able to walk around the neighbourhood without difficulty and without mechanical support such as braces, a cane or crutches?                                                                                                                                           | Any problem with mobility                                                                                                 |
| Dexterity                                                            | Are you usually able to grasp and handle small objects such as a pencil or scissors?                                                                                                                                                                                                  | Any problem with dexterity                                                                                                |
| Pain                                                                 | Are you usually free of pain or discomfort?                                                                                                                                                                                                                                           | Living with any level of pain                                                                                             |
| <b>Measures of mental or psychological functioning</b>               |                                                                                                                                                                                                                                                                                       |                                                                                                                           |
| Emotion                                                              | Emotional state described as “Happy and interested in life                                                                                                                                                                                                                            | Living with less than perfect emotional state                                                                             |
| Cognition                                                            | Able to think clearly and solve problems                                                                                                                                                                                                                                              | Less than perfect cognition                                                                                               |
| Distress Level                                                       | Six questions comprising a subset of the Composite International Diagnostic Interview (CIDI) are combined to yield a distress score on a scale of 0-24. These are then grouped into 4 categories (none (0); low (1-2); medium (3-5) and high (6-24) after Rhodes et al. <sup>30</sup> | Level of emotional distress from none to high                                                                             |
| <b>Measures of disability</b>                                        |                                                                                                                                                                                                                                                                                       |                                                                                                                           |
| Long-term Disability                                                 | Do you have any long-term disabilities or handicaps?                                                                                                                                                                                                                                  | Long-term disability and handicap lasting more than six months or more, as defined by the respondent                      |
| Needs assistance with Basic Activities of Daily Living (ADL)         | Need for assistance with daily living including eating, bathing dressing, or moving about a residence.                                                                                                                                                                                | Indicates a more severe level of disability.                                                                              |
| Needs assistance with Instrumental Activities of Daily Living (IADL) | Need for assistance with daily living including shopping for groceries, meal preparation, light or heavy work                                                                                                                                                                         | A more mild or moderate level of disability compared with those needing assistance with basic activities of daily living. |
| Disability                                                           | Combines the results of the activity restriction question (see below) and the activities of daily living (ADL) questions into a single measure.                                                                                                                                       | Four levels of disability from none (no restriction of activity and no need for assistance with ADL) to severe.           |
| <b>Measures of social participation</b>                              |                                                                                                                                                                                                                                                                                       |                                                                                                                           |
| Restriction of Normal Activities                                     | Because of a long term physical or mental condition or a health problem, are you limited in the kind or amount of activity you can do at home, school, work or during leisure time?                                                                                                   | Measures the impact of a health condition or long-term disability on social participation                                 |
| Current Working Status                                               | Based on a series of questions about employment in the 12 months prior to the survey. Those not currently working were asked to give reasons why they weren't working.                                                                                                                | Measures the impact of illness or disability on employment.                                                               |

---

**Global measures of health status**

---

|                                       |                                                                                                                                                                                                                                   |                                                  |
|---------------------------------------|-----------------------------------------------------------------------------------------------------------------------------------------------------------------------------------------------------------------------------------|--------------------------------------------------|
| Self-Rated Health of "Good" or better | How would you rate your health?                                                                                                                                                                                                   | Respondent's own evaluation of his or her health |
| Health Utilities Index Score (mean)   | A two-part method estimating a utility value for each respondent. First, 30 questions ascertain the level of impairment for 8 attributes. Second, attribute impairments are combined to estimate a utility score between 0 and 1. | A summary measure of physical functioning        |
